# Supplementary material for: Melodamide A from Melodorum fruticosum — Quantification using HPLC and one‐step‐isolation by centrifugal partition chromatography
Source: PubMed Central journal article supplement — J Sep Sci. 2019 Aug 29;42(20):3165–72. doi: 10.1002/jssc.201900392 (PMC6852412; doi:10.1002/jssc.201900392), 2019-08-29
Supplement: JSSC-42-3165-s001.pdf [file JSSC-42-3165-s001.pdf]

# Supporting Information

## Melodamide A from *Melodorum fruticosum* – Quantification using HPLC-DAD and One-Step-Isolation by Centrifugal Partition Chromatography

*Nora S. Engels*<sup>1</sup>, *Birgit Waltenberger*<sup>1</sup>, *Stefan Schwaiger*<sup>1</sup>, *Loi Huynh*<sup>2</sup>, *Hung Tran*<sup>2</sup>, and  
*Hermann Stuppner*<sup>1</sup>

<sup>1</sup>Institute of Pharmacy/ Pharmacognosy and Center for Molecular Biosciences Innsbruck (CMBI), University of Innsbruck, Innrain 80-82, 6020 Innsbruck, Austria,

<sup>2</sup>Department of Pharmacognosy, Faculty of Pharmacy, University of Medicine and Pharmacy at Hồ Chí Minh City, 41-43 Đinh Tiên Hoàng, Bến Nghé, Quận 1, Hồ Chí Minh, Vietnam

### **List of contents:**

Table S1. Partition coefficients ( $K$ ) of compounds **2-14** in two-phase solvent systems.

**Table S1.** Partition coefficients ( $K$ ) of compounds **2-14** in two-phase solvent systems.

| Solvent System                 | Ratio (v/v) | Partition Coefficient ( $K$ ) <sup>a)</sup> |       |       |        |       |                    |       |       |       |                    |      |
|--------------------------------|-------------|---------------------------------------------|-------|-------|--------|-------|--------------------|-------|-------|-------|--------------------|------|
|                                |             | 2                                           | 3     | 4     | 5/6/7  | 8     | 9                  | 10    | 11    | 12/13 | 14                 |      |
| <i>n</i> -hex/EtOAc/MeOH/water | 9:1:9:1     | 0.00                                        | 0.00  | 0.00  | 0.00   | 0.00  | 0.00               | 0.00  | 0.05  | 0.02  | 0.03               | 0.00 |
| <i>n</i> -hex/EtOAc/MeOH/water | 8:2:8:2     | 0.00                                        | 0.00  | 0.00  | 0.00   | 0.00  | 0.00               | 0.00  | 0.07  | 0.04  | 0.06               | 0.00 |
| <i>n</i> -hex/EtOAc/MeOH/water | 7:3:7:3     | 0.00                                        | 0.01  | 0.02  | 0.02   | 0.01  | 0.00               | 0.00  | 0.14  | 0.13  | 0.25               | 0.24 |
| <i>n</i> -hex/EtOAc/MeOH/water | 7:3:6:4     | 0.00                                        | 0.00  | 0.00  | 0.00   | 0.00  | 0.00               | 0.00  | 0.31  | 0.43  | 0.80               | 1.33 |
| <i>n</i> -hex/EtOAc/MeOH/water | 6:4:6:4     | 0.00                                        | 0.03  | 0.05  | 0.07   | 0.04  | 0.00               | 0.00  | 0.43  | 0.64  | 1.04               | 1.40 |
| <i>n</i> -hex/EtOAc/MeOH/water | 7:3:5:5     | 0.00                                        | 0.00  | 0.00  | 0.08   | 0.00  | 0.00               | 0.00  | 0.73  | 1.53  | 1.90               | 6.50 |
| <i>n</i> -hex/EtOAc/MeOH/water | 5:5:5:5     | 0.05                                        | 0.15  | 0.28  | 0.33   | 0.23  | 0.39               | 1.61  | 4.15  | 6.91  | N.D. <sup>b)</sup> |      |
| <i>n</i> -hex/EtOAc/MeOH/water | 3:7:5:5     | 0.32                                        | 0.56  | 0.91  | 1.02   | 0.98  | 1.26               | 2.93  | 7.88  | 13.70 | N.D.               |      |
| <i>n</i> -hex/EtOAc/MeOH/water | 4:6:4:6     | 0.33                                        | 0.69  | 1.32  | 1.54   | 1.37  | 2.67               | 5.43  | 14.07 | 15.23 | 26.15              |      |
| <i>n</i> -hex/EtOAc/MeOH/water | 3:7:4:6     | 0.74                                        | N.D.  | 2.57  | 2.88   | 3.16  | 4.56               | 12.28 | N.D.  | N.D.  | N.D.               |      |
| <i>n</i> -hex/EtOAc/MeOH/water | 4:10:4:10   | 2.38                                        | 3.61  | 8.62  | 9.38   | 14.52 | 20.22              | 34.13 | 79.79 | 94.41 | N.D.               |      |
| <i>n</i> -hex/EtOAc/MeOH/water | 2:8:2:8     | 8.10                                        | N.D.  | 2.80  | N.D.   | N.D.  | N.D.               | N.D.  | N.D.  | N.D.  | N.D.               |      |
| <i>n</i> -hex/EtOAc/MeOH/water | 1:9:1:9     | N.D.                                        | N.D.  | N.D.  | 116.92 | N.D.  | N.D.               | N.D.  | N.D.  | N.D.  | N.D.               |      |
| <i>n</i> -hex/EtOAc/MeOH/water | 0:10:0:10   | N.D.                                        | N.D.  | N.D.  | 155.00 | N.D.  | N.D.               | N.D.  | N.D.  | N.D.  | N.D.               |      |
| EtOAc/DME/water                | 2:1:1       | 5.93                                        | 9.33  | 21.41 | 17.61  | 17.68 | N.D. <sup>b)</sup> | N.D.  | N.D.  | N.D.  | N.D.               |      |
| MTBE/DME/water                 | 1:2:1       | 1.01                                        | 17.53 | 23.31 | 1.50   | 4.23  | 1.95               | 3.82  | 26.45 | N.D.  | N.D.               |      |
| MTBE/DME/water                 | 2:1:2       | 3.12                                        | 2.57  | 8.00  | 10.32  | 13.43 | N.D.               | 33.14 | N.D.  | N.D.  | N.D.               |      |
| MTBE/DME/water                 | 2:2:1       | 0.97                                        | 1.45  | 2.35  | 2.65   | 10.40 | 4.86               | 7.18  | 35.84 | N.D.  | N.D.               |      |
| MTBE/DME/water                 | 2:2:2       | 1.49                                        | 2.11  | 4.20  | 4.63   | 14.65 | 11.14              | 14.98 | N.D.  | N.D.  | N.D.               |      |
| <i>n</i> -hep/DCM/ACN          | 10:3:7      | 0.00                                        | 0.02  | 0.01  | 0.02   | 0.01  | 0.00               | 0.04  | 0.02  | 0.02  | 0.00               |      |

| Solvent System                      | Ratio (v/v) | Partition Coefficient ( $K$ ) <sup>a)</sup> |        |        |        |        |      |       |      |       |      |
|-------------------------------------|-------------|---------------------------------------------|--------|--------|--------|--------|------|-------|------|-------|------|
|                                     |             | 2                                           | 3      | 4      | 5/6/7  | 8      | 9    | 10    | 11   | 12/13 | 14   |
| <i>n</i> -hex/EtOAc/MeOH/water /DME | 7:3:6:4:2   | 0.00                                        | 0.02   | 0.03   | 0.04   | 0.02   | 0.00 | 0.24  | 0.29 | 0.50  | 0.61 |
| MTBE/DME/Ace/water                  | 4:1:1:4     | 3.18                                        | 2.98   | 7.85   | 9.10   | N.D.   | N.D. | 24.04 | N.D. | N.D.  | N.D. |
| <i>n</i> -hex/ACN                   | 1:1         | 0.00                                        | 0.00   | 0.00   | 0.00   | 0.00   | 0.00 | 0.00  | 0.00 | 0.00  | 0.00 |
| MTBE/EtOAc/water                    | 2:1:2       | N.D.                                        | N.D.   | 78.30  | 73.78  | 93.90  | N.D. | N.D.  | N.D. | N.D.  | N.D. |
| MTBE/EtOH/water                     | 2:1:2       | 9.03                                        | 9.03   | 11.19  | 13.19  | 25.91  | N.D. | 18.20 | N.D. | N.D.  | N.D. |
| MTBE/MeOH/water                     | 2:1:2       | 6.55                                        | 4.89   | 9.92   | 12.54  | 23.18  | N.D. | 20.63 | N.D. | N.D.  | N.D. |
| MTBE/ <i>n</i> -prop/water          | 2:1:2       | N.D.                                        | 48.74  | 55.30  | 55.97  | 87.52  | N.D. | N.D.  | N.D. | N.D.  | N.D. |
| MTBE/2-prop/water                   | 2:1:2       | N.D.                                        | 20.96  | 31.98  | 29.53  | 50.18  | N.D. | N.D.  | N.D. | N.D.  | N.D. |
| MTBE/ <i>n</i> -BuOH/water          | 2:1:2       | N.D.                                        | 179.20 | 260.21 | 208.63 | 218.70 | N.D. | N.D.  | N.D. | N.D.  | N.D. |

a) Calculation based on the analysis results using the developed HPLC method at 230 nm

b) N.D. not detected in the lower phase
